# Supplementary material for: A DNA metabarcoding approach for recovering plankton communities from archived samples fixed in formalin
Source: PubMed Central journal article supplement (PMC7888612; doi:10.1371/journal.pone.0245936), 2021-02-17
Supplement: pone.0245936.s001.pdf [file pone.0245936.s001.pdf]

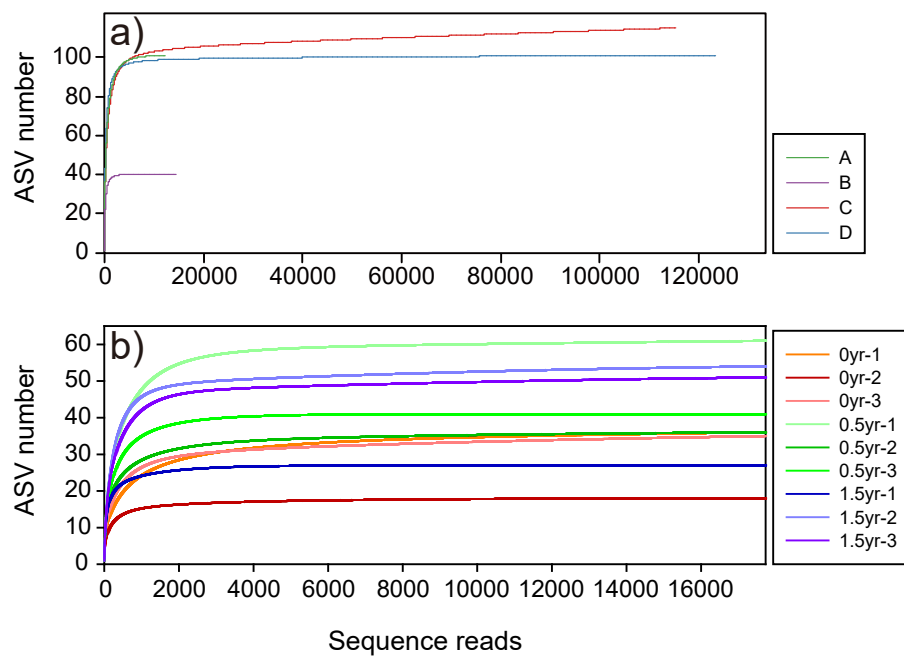

Fig. S1 Rarefaction curves for sample a) A, B, C, and D and b) E for each condition.
